# Antiatherogenic Effect of Pioglitazone in Type 2 Diabetic Patients Irrespective of the Responsiveness to Its Antidiabetic Effect

NORIKO SATOH, MD, PHD<sup>1</sup>  
YOSHIHIRO OGAWA, MD, PHD<sup>2</sup>  
TAKESHI USUI, MD, PHD<sup>1</sup>  
TETSUYA TAGAMI, MD, PHD<sup>1</sup>  
SHIGEO KONO, MD, PHD<sup>1</sup>  
HIROKO UESUGI, MD, PHD<sup>3</sup>

HIROYUKI SUGIYAMA, MD, PHD<sup>3</sup>  
AKIRA SUGAWARA, MD, PHD<sup>1</sup>  
KAZUNORI YAMADA, MD, PHD<sup>1</sup>  
AKIRA SHIMATSU, MD, PHD<sup>1</sup>  
HIDESHI KUZUYA, MD, PHD<sup>1</sup>  
KAZUWA NAKAO, MD, PHD<sup>2</sup>

**OBJECTIVE** — Thiazolidinediones (TZDs), a class of insulin-sensitizing agents used clinically to treat type 2 diabetes, are also antiatherogenic. This study was designed to elucidate the relationship between the antiatherogenic and antidiabetic effects of pioglitazone, a TZD, in type 2 diabetic patients.

**RESEARCH DESIGN AND METHODS** — A total of 136 Japanese type 2 diabetic patients were included and divided into two groups: the pioglitazone-treated group (30 mg daily for 3 months) ( $n = 70$ ) and the untreated control group ( $n = 66$ ). The changes in glycolipid metabolism as well as plasma high-sensitivity C-reactive protein (CRP), leptin, adiponectin, and pulse wave velocity (PWV) were monitored to analyze the relationship between the antiatherogenic and antidiabetic effects of pioglitazone.

**RESULTS** — The pioglitazone treatment significantly reduced hyperglycemia, hyperinsulinemia, and HbA<sub>1c</sub> levels and increased plasma adiponectin concentrations relative to the control group ( $P < 0.01$ ). It also significantly decreased CRP and PWV ( $P < 0.01$ ). The antiatherogenic effect was observed in both the nonresponders showing  $<1\%$  of reduction in HbA<sub>1c</sub> ( $n = 30$ ) and responders showing  $>1\%$  of reduction ( $n = 40$ ). ANCOVA revealed that treatment with pioglitazone was associated with a low CRP and PWV, independent of the changes in parameters related to glucose metabolism.

**CONCLUSIONS** — This study represents the first demonstration of the antiatherogenic effect of pioglitazone in both nonresponders and responders with respect to its antidiabetic effect and suggests that pioglitazone can exert its antiatherogenic effect independently of its antidiabetic effect.

*Diabetes Care* 26:2493–2499, 2003

From the <sup>1</sup>Diabetes Center and Clinical Research Institute of Kyoto National Hospital, Kyoto, Japan; the <sup>2</sup>Department of Medicine and Clinical Science, Kyoto University Graduate School of Medicine, Kyoto, Japan; and the <sup>3</sup>Department of Internal Medicine, Saiseikai Noe Hospital, Osaka, Japan.

Address correspondence and reprint requests to Yoshihiro Ogawa, MD, PhD, Department of Molecular Medicine and Metabolism, Medical Research Institute, Tokyo Medical and Dental University, 2-3-10 Kanda-surugadai, Chiyoda-ku, Tokyo 101-0062, Japan. E-mail: ogawa.mmm@mri.tmd.ac.jp.

Received for publication 23 February 2003 and accepted in revised form 1 June 2003.

**Abbreviations:** CRP, C-reactive protein; DBP, diastolic blood pressure; FPG, fasting plasma glucose; HOMA-IR, homeostasis model assessment for insulin resistance; IMT, intima-media wall thickness; IRI, immunoreactive insulin; PPAR- $\gamma$ , peroxisome proliferator-activated receptor- $\gamma$ ; PWV, pulse-wave velocity; SBP, systolic blood pressure; TZD, thiazolidinedione; VSMC, vascular smooth muscle cell;

A table elsewhere in this issue shows conventional and Système International (SI) units and conversion factors for many substances.

© 2003 by the American Diabetes Association.

Type 2 diabetes contributes to the risk of developing atherosclerotic diseases such as coronary heart disease and stroke and coronary restenosis after angioplasty or stenting (1–4). Therefore, it is of clinical importance to evaluate and treat cardiovascular complications in type 2 diabetic patients beyond glycemic control.

Peroxisome proliferator-activated receptor- $\gamma$  (PPAR- $\gamma$ ) is a member of the nuclear receptor superfamily that, when activated by insulin sensitizers of the thiazolidinedione (TZD) class, including troglitazone, pioglitazone, and rosiglitazone, regulates a host of target genes (5,6). In humans with and animal models of insulin resistance and type 2 diabetes, TZDs can improve hyperglycemia and hyperinsulinemia and are currently used to manage type 2 diabetes (7). PPAR- $\gamma$  occurs abundantly in adipocytes where it regulates adipocyte differentiation (8), but it is also expressed in all major cell types participating in vascular injury, namely, endothelial cells, vascular smooth muscle cells (VSMCs), and macrophages (9,10). PPAR- $\gamma$  regulates the recruitment of monocytes to endothelial cells (11), modulates the inflammatory response in monocytes/macrophages and VSMCs (12–14), and inhibits macrophage foam cell formation and VSMCs proliferation and migration (13–15). In experimental models of atherosclerosis, ligand-activated PPAR- $\gamma$  prevents the progression of atherosclerotic lesions, with a concomitant reduction in macrophage accumulation in the atheromatous plaque (16–18). It is likely that the antiatherogenic effect of TZDs is mediated primarily through their direct action on the vasculature.

In human clinical studies that involve patients with type 2 diabetes, troglitazone and pioglitazone decreased the carotid arterial intima-media wall thickness (IMT) (19,20). Furthermore, it was recently reported that troglitazone reduced neointi-

Table 1—Baseline characteristics of patients treated with or without pioglitazone

| Variables                                             | Control     | Pioglitazone |
|-------------------------------------------------------|-------------|--------------|
| n                                                     | 66          | 70           |
| Sex (male/female)                                     | 32/34       | 32/38        |
| Age (years)                                           | 59.3 ± 1.9  | 61.2 ± 1.3   |
| BMI (kg/m <sup>2</sup> )                              | 23.0 ± 0.5  | 23.4 ± 0.4   |
| SBP (mmHg)                                            | 146 ± 2     | 144 ± 2      |
| DBP (mmHg)                                            | 82 ± 2      | 81 ± 2       |
| FPG (mmol/l)                                          | 9.4 ± 0.3   | 9.6 ± 0.4    |
| HbA <sub>1c</sub> (%)                                 | 8.0 ± 0.2   | 8.1 ± 0.1    |
| IRI (pmol/l)                                          | 55.9 ± 4.10 | 57.5 ± 3.96  |
| HOMA-IR                                               | 3.30 ± 0.28 | 3.35 ± 0.29  |
| Total cholesterol (mmol/l)                            | 5.45 ± 0.16 | 5.46 ± 0.10  |
| LDL cholesterol (mmol/l)                              | 3.32 ± 0.11 | 3.30 ± 0.08  |
| HDL cholesterol (mmol/l)                              | 1.47 ± 0.10 | 1.44 ± 0.05  |
| Triglycerides (mmol/l)                                | 1.55 ± 0.04 | 1.56 ± 0.04  |
| Adiponectin (μg/ml)                                   | 6.08 ± 0.42 | 6.03 ± 0.34  |
| Leptin (ng/ml)                                        | 6.56 ± 0.45 | 6.52 ± 0.50  |
| Treatment of diabetes (n)                             |             |              |
| Diet alone                                            | 28          | 28           |
| Diet + sulfonylureas                                  | 38          | 42           |
| Diet + metformin                                      | 0           | 0            |
| Use of antihypertensive medications (n)               |             |              |
| ACE inhibitors or angiotensin II receptor antagonists | 0           | 0            |
| Other                                                 | 22          | 27           |
| Use of lipid-lowering medications (n)                 |             |              |
| Statins                                               | 19          | 13           |
| Fibrates                                              | 3           | 1            |
| Other                                                 | 3           | 1            |

Data are means ± SEM. All group differences are nonsignificant.

mal tissue proliferation after coronary implantation in patients with type 2 diabetes (21,22). These observations indicate that TZDs may be therapeutically used as antiatherogenic as well as antidiabetic agents. Metabolic changes could contribute to the reduction in neointimal formation, although direct effects of troglitazone on the vasculature are likely to play a role in humans as well. However, whether TZDs can exert their antiatherogenic effect independent of their antidiabetic effect has never been addressed in humans.

It has been recognized that some type 2 diabetic patients respond to TZDs with the improvement of hyperglycemia and hyperinsulinemia (termed responders), whereas others do not (termed nonresponders) (23,24). Taking advantage of such differences, we studied the relationship between the antiatherogenic and antidiabetic effects of TZDs. Here we show that pioglitazone effectively reduces plasma high-sensitivity C-reactive protein (CRP) (25,26) levels, a marker of inflam-

mation, and pulse-wave velocity (PWV) (27,28), which is a direct parameter of arterial distensibility, in both nonresponders and responders to its antidiabetic effect.

This study is the first to provide evidence that pioglitazone can exert its antiatherogenic effect, irrespective of the responsiveness to its antidiabetic effect, thereby suggesting that the antiatherogenic effect of pioglitazone is mediated primarily via mechanisms distinct from its antidiabetic effect.

## RESEARCH DESIGN AND METHODS

### Subjects

A total of 136 Japanese patients with type 2 diabetes (64 men and 72 women, mean age 59.9 ± 1.4 years) participated in this study (Table 1). In our outpatient clinics during a specified period, we recruited type 2 diabetic patients who had stable and relatively high blood glucose and HbA<sub>1c</sub> levels (HbA<sub>1c</sub> 7.0–9.0%). We as-

signed the patients to the pioglitazone-treated and untreated groups one after the other. The patients were divided into the pioglitazone-treated group and the untreated control group. In the pioglitazone-treated group (n = 70), pioglitazone (30 mg daily) was administered for 3 months. Before the study, the 42 patients in the treatment group and 38 in the control group had been treated with sulfonylureas, whereas 28 and 28 patients, respectively, had been treated only with diet. Sulfonylureas were continued at fixed dosages throughout this study. None of patients in the treatment group and the control group had been treated with metformin. In this study, the pioglitazone-treated patients were divided into two groups according to their responsiveness to the treatment; the responders were those showing >1% of reduction in HbA<sub>1c</sub> 3 months after the treatment, and the nonresponders were those showing <1% of HbA<sub>1c</sub> reduction. This is based on the criteria of responders who showed a marked clinical response to the TZD and nonresponders who showed no response to it as demonstrated by Suter et al. (24). All patients were instructed to maintain the same level of energy intake and physical activity throughout this study. Patients treated with ACE inhibitors or angiotensin II receptor antagonists were excluded. Other antihypertensive medications were used in 17 patients in the treatment group and in 12 patients in the control group. Lipid-lowering medications, such as statins and fibrates were also used in the same proportion of patients in both groups. None of the patients of this study received hormone replacement therapy. This study was conducted after the study protocol was approved by the Ethical Committee on Human Research of Kyoto National Hospital and Saiseikai Noe Hospital and with the patients' informed consent.

### Blood sampling, plasma separation, and biochemistry and hormonal assays

Blood was sampled at 0700 from the antecubital vein with the patient in the recumbent position after an overnight fast. For plasma separation, each blood sample was immediately transferred to chilled siliconized glass tubes containing EDTA (1 mg/ml) and centrifuged at 4°C. Plasma samples were frozen and stored at –70°C until the assays for adiponectin and leptin

concentrations. Fasting plasma glucose (FPG), HbA<sub>1c</sub>, total cholesterol, LDL cholesterol, HDL cholesterol, and triglycerides levels were measured according to the standard procedures. Plasma insulin concentrations (immunoreactive insulin [IRI]) were measured by enzyme immunoassay using a commercially available kit (Tosoh, Tokyo, Japan). The insulin resistance index was assessed by homeostasis model assessment for insulin resistance (HOMA-IR) (29). Plasma levels of CRP were measured by the latex-enhanced assay using particle-enhanced technology performed on the Behring BN nephelometer (Dade Behring, Newark, DE) (30). Plasma concentrations of adiponectin and leptin were determined using the respective radioimmunoassay kits (Linco Research, St. Charles, MO), according to recommendations provided by the manufactures (31).

### Measurements of blood pressure and PWV

Systolic and diastolic blood pressures (SBP and DBP) were measured twice with an automatic electronic sphygmomanometer (BP-103i II; Nippon Colin, Komaki, Japan) with the patient in the sitting position after rest for at least 5 min.

A newly developed device that allows an automated multiple pulse wave measurement, ABI-form (model BP-203RPE, Nippon Colin) was used to measure PWV. This produced noninvasively four different parts PWVs in the body. PWV was measured before and 3 months after the pioglitazone treatment. In this study, PWV was calculated as the mean of left brachial-ankle PWV and that of right brachial-ankle PWV.

### Statistical analysis

Data are presented as the mean  $\pm$  SEM, and  $P < 0.05$  was considered statistically significant. Two-tailed Student's *t* test was used for baseline comparison between the two groups and comparison of differences between means within each group before and after the treatment. Differences among the nonresponders, responders, and control group were assessed with two-way repeated measures ANOVA with Fisher's protected least significant difference post hoc test. The pioglitazone treatment differences for  $\Delta$ CRP,  $\Delta$ adiponectin, and  $\Delta$ PWV as dependent variables were assessed using ANCOVA models that include the following covari-

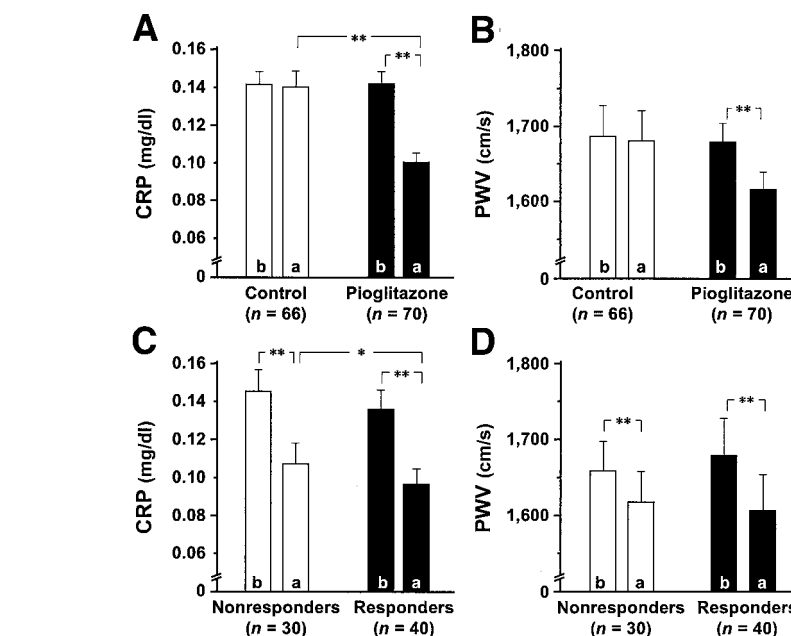

**Figure 1**—A and B: Plasma CRP levels and PWV in the control and pioglitazone-treated groups before and at the end of this study. Each column and bar represents the mean  $\pm$  SEM before (B) and after 3 months (A). \*\* $P < 0.01$ . C and D: Plasma CRP levels and PWV in the nonresponders and responders before and 3 months after treatment with pioglitazone. Each column and bar represents the mean  $\pm$  SEM before (B) and after 3 months (A). \* $P < 0.05$ ; \*\* $P < 0.01$ .

ates:  $\Delta$ HbA<sub>1c</sub>,  $\Delta$ HOMA-IR,  $\Delta$ BMI,  $\Delta$ SBP,  $\Delta$ DBP,  $\Delta$ LDL, and  $\Delta$ triglycerides. All statistical analyses were performed using the Stat View program version 5.0 for Windows (SAS Institute).

## RESULTS

### Baseline profiles of the pioglitazone-treated and control groups

There was no significant difference between the pioglitazone-treated and control groups in age, sex ratio, BMI, SBP, DBP, FPG, HbA<sub>1c</sub>, IRI, total cholesterol, LDL cholesterol, HDL cholesterol, and triglycerides before the pioglitazone treatment (Table 1). The two groups did not differ significantly in plasma adiponectin and leptin concentrations (Table 1) and CRP and PWV (Fig. 1) at baseline.

### Effects of pioglitazone treatment in all the study subjects

In the control group, BMI, SBP, DBP, FPG, HbA<sub>1c</sub>, total cholesterol, LDL cholesterol, HDL cholesterol, and triglycerides remained unchanged during this study (Table 2). There were no significant changes in plasma adiponectin and leptin concentrations and CRP and PWV in the control group during this study (Table 2, Fig. 1).

After treatment with pioglitazone, FPG, HbA<sub>1c</sub>, HOMA-IR, and LDL cholesterol decreased significantly (FPG, HbA<sub>1c</sub>, and HOMA-IR,  $P < 0.01$ ; LDL cholesterol,  $P < 0.05$ ), whereas BMI, SBP, DBP, total cholesterol, HDL cholesterol, and triglycerides remained unchanged (Table 2). IRI tended to decrease in the pioglitazone-treated group but did not reach statistical significance. Plasma adiponectin concentrations increased significantly after treatment with pioglitazone ( $P < 0.01$ ). In this study, plasma leptin concentrations did not change after pioglitazone treatment.

### Effects of pioglitazone treatment in the nonresponders and responders

On average, the responders in the pioglitazone-treated group showed a significant decrease in HbA<sub>1c</sub> ( $\Delta$ HbA<sub>1c</sub> =  $1.5 \pm 0.1\%$ ;  $P < 0.01$ ), although it did not decrease significantly after treatment in the nonresponders (Table 3). Accordingly, after treatment with pioglitazone, FPG was significantly decreased in the responders ( $P < 0.01$ ), and this was associated with a significant reduction of HOMA-IR ( $P < 0.01$ ). By contrast, HOMA-IR was reduced only slightly in the nonresponders ( $P < 0.05$ ). In this study, total cholesterol, LDL cholesterol,

Table 2—Results of 3-month additional treatment with pioglitazone in the study patients

| Variables                  | Control (n = 66) |             | Pioglitazone (n = 70) |               |
|----------------------------|------------------|-------------|-----------------------|---------------|
|                            | Baseline         | 3 months    | Baseline              | 3 months      |
| BMI (kg/m <sup>2</sup> )   | 23.0 ± 0.5       | 23.2 ± 0.5  | 23.4 ± 0.4            | 23.5 ± 0.4    |
| SBP (mmHg)                 | 146 ± 2          | 146 ± 3     | 144 ± 2               | 145 ± 2       |
| DBP (mmHg)                 | 82 ± 2           | 82 ± 2      | 81 ± 2                | 81 ± 2        |
| FPG (mmol/l)               | 9.4 ± 0.3        | 9.2 ± 0.3   | 9.6 ± 0.4             | 8.0 ± 0.3†§   |
| HbA <sub>1c</sub> (%)      | 8.0 ± 0.2        | 7.9 ± 0.2   | 8.1 ± 0.1             | 7.1 ± 0.1†§   |
| IRI (pmol/l)               | 55.9 ± 4.10      | 54.9 ± 4.10 | 57.5 ± 3.96           | 51.7 ± 5.18   |
| HOMA-IR                    | 3.30 ± 0.28      | 3.20 ± 0.29 | 3.35 ± 0.29           | 2.25 ± 0.17†§ |
| Total cholesterol (mmol/l) | 5.45 ± 0.16      | 5.46 ± 0.17 | 5.46 ± 0.10           | 5.33 ± 0.10   |
| LDL cholesterol (mmol/l)   | 3.32 ± 0.11      | 3.33 ± 0.12 | 3.30 ± 0.08           | 3.17 ± 0.08*  |
| HDL cholesterol (mmol/l)   | 1.47 ± 0.10      | 1.43 ± 0.11 | 1.44 ± 0.05           | 1.47 ± 0.05   |
| Triglycerides (mmol/l)     | 1.55 ± 0.04      | 1.57 ± 0.06 | 1.56 ± 0.04           | 1.50 ± 0.04   |
| Adiponectin (μg/ml)        | 6.08 ± 0.42      | 6.06 ± 0.39 | 6.03 ± 0.34           | 7.82 ± 0.52†‡ |
| Leptin (ng/ml)             | 6.56 ± 0.45      | 6.58 ± 0.45 | 6.52 ± 0.50           | 6.63 ± 0.46   |

Data are means ± SEM. \* $P < 0.05$ , † $P < 0.01$  vs. baseline values; ‡ $P < 0.05$ , § $P < 0.01$  vs. control.

and triglycerides decreased significantly in the responders ( $P < 0.05$ ) but not in the nonresponders (Table 3).

Before treatment with pioglitazone, no significant difference in CRP was noted between the nonresponders and responders (Fig. 1). CRP decreased significantly in both the nonresponders and responders 3 months after treatment (nonresponders,  $0.15 \pm 0.01 \rightarrow 0.11 \pm 0.01$  mg/dl,  $P < 0.01$ ; responders,  $0.14 \pm 0.01 \rightarrow 0.10 \pm 0.01$  mg/dl,  $P < 0.01$ ), and the decrease in CRP was significantly greater in the responders than in the nonresponders ( $P < 0.05$ ) (Fig. 1). After treatment with pioglitazone, PWV was significantly reduced

in both the nonresponders and responders (nonresponders,  $1,658 \pm 40 \rightarrow 1,618 \pm 40$  cm/s,  $P < 0.01$ ; responders,  $1,678 \pm 48 \rightarrow 1,607 \pm 46$  cm/s,  $P < 0.01$ ). There was no significant difference in PWV between the nonresponders and responders 3 months after treatment (Fig. 1).

Before treatment, there was no significant difference in plasma adiponectin concentration between the nonresponders and responders (Table 3). Plasma adiponectin concentrations increased significantly in both the responders and nonresponders (nonresponders,  $5.98 \pm 0.52 \rightarrow 7.48 \pm 0.71$  μg/ml,  $P <$

$0.01$ ; responders,  $6.07 \pm 0.46 \rightarrow 8.08 \pm 0.73$  μg/ml,  $P < 0.01$ ). Before treatment, plasma leptin concentrations were slightly higher in the responders than in the nonresponders. After treatment, plasma leptin concentrations remained unchanged in both subgroups.

#### Analysis of the association of $\Delta$ PWV with $\Delta$ adiponectin, $\Delta$ CRP, and other variables

In the control and pioglitazone-treated groups, analysis of Pearson's correlation revealed that  $\Delta$ PWV significantly correlated only with  $\Delta$ CRP ( $r = 0.285$ ) and  $\Delta$ adiponectin ( $r = -0.318$ ) (data not

Table 3—Results of 3-month additional treatment with pioglitazone in the study patients divided into two subgroups

| Variables                  | Nonresponders (n = 30) |              | Responders (n = 40) |               |
|----------------------------|------------------------|--------------|---------------------|---------------|
|                            | Baseline               | 3 months     | Baseline            | 3 months      |
| Sex (male/female)          | 12/18                  |              | 20/20               |               |
| Age (years)                | 60.4 ± 2.1             |              | 61.8 ± 1.6          |               |
| BMI (kg/m <sup>2</sup> )   | 22.7 ± 0.6             | 23.0 ± 0.6†  | 23.9 ± 0.5          | 23.9 ± 0.5    |
| SBP (mmHg)                 | 144 ± 4                | 143 ± 3      | 144 ± 3             | 146 ± 3       |
| DBP (mmHg)                 | 80 ± 2                 | 80 ± 2       | 82 ± 2              | 83 ± 3        |
| FPG (mmol/l)               | 9.4 ± 0.5              | 8.9 ± 0.4    | 9.7 ± 0.5           | 7.3 ± 0.4†‡   |
| HbA <sub>1c</sub> (%)      | 7.8 ± 0.2              | 7.7 ± 0.2    | 8.3 ± 0.1‡          | 6.8 ± 0.1†‡   |
| IRI (pmol/l)               | 49.7 ± 4.96            | 46.8 ± 4.75  | 63.3 ± 5.76         | 55.5 ± 8.42   |
| HOMA-IR                    | 2.96 ± 0.38            | 2.62 ± 0.31* | 3.65 ± 0.42         | 1.97 ± 0.16†‡ |
| Total cholesterol (mmol/l) | 5.40 ± 0.12            | 5.42 ± 0.11  | 5.51 ± 0.15         | 5.27 ± 0.16*  |
| LDL cholesterol (mmol/l)   | 3.32 ± 0.09            | 3.27 ± 0.09  | 3.30 ± 0.11         | 3.09 ± 0.12*  |
| HDL cholesterol (mmol/l)   | 1.37 ± 0.08            | 1.43 ± 0.08  | 1.50 ± 0.07         | 1.51 ± 0.07   |
| Triglycerides (mmol/l)     | 1.54 ± 0.06            | 1.56 ± 0.05  | 1.57 ± 0.05         | 1.46 ± 0.06*  |
| Adiponectin (μg/ml)        | 5.98 ± 0.52            | 7.48 ± 0.71† | 6.07 ± 0.46         | 8.08 ± 0.73†  |
| Leptin (ng/ml)             | 6.16 ± 0.79            | 6.21 ± 0.77  | 6.79 ± 0.66         | 6.95 ± 0.56   |

Data are means ± SEM. \* $P < 0.05$ , † $P < 0.01$  vs. baseline values; ‡ $P < 0.05$  vs. nonresponders.



**Table 4—ANCOVA models showing the differences associated with treatment with pioglitazone in CRP, PWV, and adiponectin**

| Variables with pioglitazone treatment | Covariates                              | Regression coefficient (SEM) | P value |
|---------------------------------------|-----------------------------------------|------------------------------|---------|
| $\Delta$ CRP                          | Unadjusted                              | −0.018 (0.010)               | 0.0262  |
|                                       | Adjusted for $\Delta$ HbA <sub>1c</sub> | −0.041 (0.013)               | 0.0015  |
|                                       | $\Delta$ HOMA-IR                        | −0.027 (0.010)               | 0.0117  |
|                                       | $\Delta$ BMI                            | −0.042 (0.010)               | 0.0001  |
| $\Delta$ PWV                          | Unadjusted                              | −51.94 (21.61)               | 0.0180  |
|                                       | Adjusted for $\Delta$ HbA <sub>1c</sub> | −50.64 (27.99)               | 0.0423  |
|                                       | $\Delta$ HOMA-IR                        | −47.03 (23.31)               | 0.0463  |
|                                       | $\Delta$ sBP and $\Delta$ dbP           | −69.49 (26.87)               | 0.0112  |
|                                       | $\Delta$ LDL                            | −54.29 (21.89)               | 0.0147  |
|                                       | $\Delta$ Triglycerides                  | −49.89 (21.75)               | 0.0238  |
|                                       | $\Delta$ CRP                            | −34.56 (23.12)               | 0.1381  |
|                                       | $\Delta$ Adiponectin                    | −29.99 (22.47)               | 0.1850  |
| $\Delta$ Adiponectin                  | Unadjusted                              | 1.808 (0.474)                | 0.0002  |
|                                       | Adjusted for $\Delta$ HbA <sub>1c</sub> | 1.522 (0.616)                | 0.0151  |
|                                       | $\Delta$ HOMA-IR                        | 0.547 (0.147)                | 0.0003  |

Changes in variables are indicated by subtracting the pretreatment value from the post-treatment value.

shown). We also examined the significance of pioglitazone regarding  $\Delta$ CRP,  $\Delta$ adiponectin, and  $\Delta$ PWV as dependent variables using ANCOVA models that include  $\Delta$ HbA<sub>1c</sub> and  $\Delta$ HOMA-IR as covariates. As shown in Table 4, after adjustment for  $\Delta$ HbA<sub>1c</sub> and  $\Delta$ HOMA-IR, ANCOVA revealed that treatment with pioglitazone was associated with  $\Delta$ CRP and  $\Delta$ adiponectin. Furthermore, the pioglitazone treatment was associated with  $\Delta$ PWV, dependent on only  $\Delta$ CRP and  $\Delta$ adiponectin, irrespective of  $\Delta$ HbA<sub>1c</sub>,  $\Delta$ HOMA-IR,  $\Delta$ blood pressure,  $\Delta$ LDL cholesterol, and  $\Delta$ triglycerides in the whole subjects. In the nonresponders and responders separately,  $\Delta$ PWV with pioglitazone treatment was associated with only  $\Delta$ adiponectin (multivariate regression coefficient,  $-11.4$ ,  $P = 0.042$ ), irrespective of  $\Delta$ HbA<sub>1c</sub> ( $19.2$ ,  $P = 0.5235$ ),  $\Delta$ LDL cholesterol ( $0.94$ ,  $P = 0.2111$ ), and  $\Delta$ CRP ( $383.1$ ,  $P = 0.1827$ ) (data not shown).

**CONCLUSIONS**— Type 2 diabetic patients are at an increased risk of developing atherosclerosis. Because of their antiatherogenic and antidiabetic effects, TZDs may offer a novel therapeutic strategy to treat diabetes-associated cardiovascular disease in type 2 diabetic patients, beyond glycemic control. Several lines of in vitro and in vivo evidence have indicated that the antiatherogenic effect of TZDs is mediated primarily through a di-

rect action on the vasculature (9–18). However, whether TZDs can exert the antiatherogenic effect independently of the antidiabetic effect has never been addressed in humans. The aim of this study was to elucidate the relationship between the antiatherogenic and antidiabetic effects of pioglitazone in type 2 diabetic patients.

As for its antiatherogenic effects, this study demonstrated that pioglitazone decreased significantly CRP in patients with type 2 diabetes, which is consistent with previous reports (32). Furthermore, we also observed that treatment with pioglitazone for 3 months resulted in a significant decrease in PWV. This is in agreement with that of Minamikawa et al. (19) and Koshiyama et al. (20), who reported that IMT was significantly reduced in type 2 diabetic patients administered troglitazone or pioglitazone for 3 months. Taniwaki et al. (33) previously demonstrated that there is a good correlation between carotid arterial IMT and PWV in type 2 diabetic patients. In addition, recent studies have demonstrated that PWV is not only a marker of vascular damages (34) but also a prognostic predictor of mortality in diabetes (28). Therefore, we believe that combined with other markers of atherosclerosis such as high-sensitivity CRP, PWV can serve as a reliable marker for the evaluation of the antiatherogenic effect of pioglitazone. The crucial observation in this study is that pioglitazone

decreases CRP and PWV in both the non-responders and the responders with respect to its antidiabetic effect. Furthermore, multivariate analysis revealed that  $\Delta$ CRP and  $\Delta$ PWV are independent of the changes in parameters related to glucose metabolism, i.e.,  $\Delta$ FPG,  $\Delta$ IRI,  $\Delta$ HbA<sub>1c</sub>, and  $\Delta$ HOMA-IR. Especially in the whole subjects,  $\Delta$ PWV with the pioglitazone treatment is associated with only  $\Delta$ CRP and  $\Delta$ adiponectin, irrespective of  $\Delta$ HbA<sub>1c</sub> and  $\Delta$ LDL cholesterol. These findings indicate that pioglitazone is capable of preventing the progression of atherosclerosis independent of the improvement of glucose metabolism; it is likely that the antiatherogenic effect of pioglitazone is not mediated through its antidiabetic effect. In this regard, Minamikawa et al. (19) reported that both HbA<sub>1c</sub> and postprandial triglycerides levels decreased in type 2 diabetic patients treated with troglitazone, although there were no significant correlations between the changes in the above parameters and  $\Delta$ IMT. It is known that PPAR- $\gamma$  is expressed in vascular cells, such as endothelial cell, VSMCs, and macrophages, and it may play a protective role in the development of atherosclerosis (9–15,35,36). We postulate that in humans as well, the antiatherogenic effect of pioglitazone is mediated primarily by its direct action on the vasculature.

It was demonstrated that TZDs activate PPAR- $\gamma$  expressed abundantly in the adipose tissue where it regulates the production of various adipocyte-derived hormones (collectively called adipocytokines) (37), such as leptin and adiponectin. In this study, TZDs significantly increased the plasma concentrations of adiponectin in type 2 diabetic patients, which is consistent with the findings of several previous reports (38,39,44). It is of particular interest to note that pioglitazone can increase plasma adiponectin concentrations, irrespective of the responsiveness to its antidiabetic effect. Recent studies with adiponectin-deficient mice have revealed that it plays a protective role in the development of atherosclerosis (40,41). Furthermore, decreased production of adiponectin is associated with atherosclerotic disease (42,43). Collectively, we postulate that TZDs can exert the antiatherogenic effect at least partly through the induction of adiponectin production/secretion in the adipose tissue.

Interestingly, we found that CRP was significantly reduced in the responders relative to nonresponders. These observations suggest that some of the antiatherogenic effects of pioglitazone are associated with the improvement of glucose metabolism. In this study, no significant difference in  $\Delta$ PWV was noted between the nonresponders and responders. We speculate that CRP may represent an acute inflammatory process in the vasculature (or fatty degeneration), thus being improved by the 3-month treatment with pioglitazone. On the other hand, PWV may reflect advanced sclerotic changes in the vasculature (or vascular stiffness), thus taking more time to be improved. The data of this study also suggest that CRP might be more sensitive to the acute metabolic changes induced by TZDs than PWV. Further studies are necessary to validate the above aspects.

HDL cholesterol was unchanged in both the nonresponders and responders throughout this study, which is consistent with previous studies (44). In this study, pioglitazone significantly decreased triglycerides not in the nonresponders but in the responders. Improved insulin resistance by pioglitazone might reduce triglyceride levels in the responders than in the nonresponders.

This study is observational and non-randomized. However, the patients in the control group and treatment group were well matched for age, sex ratio, BMI, SBP, DBP, FPG, HbA<sub>1c</sub>, IRI, total cholesterol, LDL cholesterol, HDL cholesterol, and triglycerides, before the pioglitazone treatment. Also, the treatment group included all diabetic patients who had been treated with pioglitazone. Thus, it provides important insights into the treatment and outcome of patients treated with pioglitazone. It was reported that there are responders and nonresponders to treatment with TZD (23,24), thus we also divided the patients into responders and nonresponders.

In conclusion, we demonstrated that pioglitazone can exert its antiatherogenic effect in type 2 diabetic patients, irrespective of responsiveness to its antidiabetic effect. This study suggests the usefulness of pioglitazone as a multiple-benefit drug that exerts on hypoglycemic effect and protects the patient from multiple risk factors. The data of this study suggest that the antiatherogenic effect of pioglitazone

results largely from its direct action on the vasculature.

**Acknowledgments**—This work was supported in part by a Grant-in-Aid for Scientific Research from the Ministry of Education, Culture, Sports, Science and Technology of Japan, and the Research Grant for Cardiovascular Diseases (13C-5) and Research Grant for Health Service (13-Health-014) from the Ministry of Health, Labor and Welfare and from Suzuken Memorial Foundation.

We thank Naoki Akamatsu and Shigeki Fujise for helpful discussions.

## References

1. Wei M, Gaskill SP, Haffner SM, Stern MP: Effects of diabetes and level of glycemia on all-cause and cardiovascular mortality: the San Antonio Heart Study. *Diabetes Care* 21:1167–1172, 1998
2. Tominaga M, Eguchi H, Manaka H, Igarashi K, Kato T, Sekikawa A: Impaired glucose tolerance is a risk factor for cardiovascular disease, but not impaired fasting glucose: the Funagata Diabetes Study. *Diabetes Care* 22:920–924, 1999
3. The Bypass Angioplasty Revascularization Investigation Investigators: Influence of diabetes on 5-year mortality and morbidity in a randomized trial comparing CABG and PTCA in patients with multivessel disease. *Circulation* 96:1761–1769, 1997
4. Meigs JB, Nathan DM, D'Agostino RB Sr, Wilson PW: Fasting and postchallenge glycemia and cardiovascular disease risk: the Framingham Offspring Study. *Diabetes Care* 25:1845–1850, 2002
5. Okuno A, Tanemoto H, Tobe K, Ueki H, Mori Y, Iwamoto K, Umesono K, Akanuma Y, Fujiwara T, Horikoshi H, Yazaki Y, Kadowaki T: Troglitazone increases the number of small adipocytes without the change of white adipose tissue mass in obese Zucker rats. *J Clin Invest* 101:1354–1361, 1998
6. Yamauchi T, Kamon J, Waki H, Murakami K, Motojima K, Komeda K, Ide T, Kubota N, Terauchi Y, Tobe K, Miki H, Tsuchida A, Akanuma Y, Nagai R, Kimura S, Kadowaki T: The mechanisms by which both heterozygous peroxisome proliferator-activated receptor  $\gamma$  (PPAR $\gamma$ ) deficiency and PPAR $\gamma$  agonist improve insulin resistance. *J Biol Chem* 276:41245–41254, 2001
7. Olefsky JM: Treatment of insulin resistance with peroxisome proliferator-activated receptor  $\gamma$  agonists. *J Clin Invest* 106:467–472, 2000
8. Spiegelman BM: PPAR- $\gamma$ : adipogenic regulator and thiazolidinedione receptor. *Diabetes* 47:507–514, 1998
9. Plutzky J: Peroxisome proliferator-activated receptors in endothelial cell biology. *Curr Opin Lipidol* 12:511–518, 2001
10. Duval C, Chinetti G, Trottein F, Fruchart JC, Staels B: The role of PPARs in atherosclerosis. *Trends Mol Med* 8:422–430, 2002
11. Jackson SM, Parhami F, Xi XP, Berliner JA, Hsueh WA, Law RE, Demer LL: Peroxisome proliferator-activated receptor activators target human endothelial cells to inhibit leukocyte-endothelial cell interaction. *Arterioscler Thromb Vasc Biol* 19:2094–2104, 1999
12. Pasceri V, Wu HD, Willerson JT, Yeh ET: Modulation of vascular inflammation in vitro and in vivo by peroxisome proliferator-activated receptor- $\gamma$  activators. *Circulation* 101:235–238, 2000
13. Ricorte M, Li AC, Willson TM, Kelly CJ, Glass CK: The peroxisome proliferator-activated receptor- $\gamma$  is a negative regulator of macrophage activation. *Nature* 391:79–82, 1998
14. Marx N, Schönbeck U, Lazar MA, Libby P, Plutzky J: Peroxisome proliferator-activated receptor gamma activators inhibit gene expression and migration in human vascular smooth muscle cells. *Circ Res* 83:1097–1103, 1998
15. Hsueh WA, Jackson S, Law RE: Control of vascular cell proliferation and migration by PPAR- $\gamma$ : a new approach to macrovascular complications of diabetes. *Diabetes Care* 24:392–397, 2001
16. Law RE, Meehan WP, Xi XP, Graf K, Wuthrich DA, Coats W, Faxon D, Hsueh WA: Troglitazone inhibits vascular smooth muscle cell growth and intimal hyperplasia. *J Clin Invest* 98:1897–1905, 1996
17. Collins AR, Meehan WP, Kintscher U, Jackson S, Wakino S, Noh G, Palinski W, Hsueh WA, Law RE: Troglitazone inhibits formation of early atherosclerotic lesions in diabetic and nondiabetic low density lipoprotein receptor-deficient mice. *Arterioscler Thromb Vasc Biol* 21:365–371, 2001
18. Li AC, Brown KK, Silvestre MJ, Willson TM, Palinski W, Glass CK: Peroxisome proliferator-activated receptor  $\gamma$  ligands inhibit development of atherosclerosis in LDL receptor-deficient mice. *J Clin Invest* 106:523–531, 2000
19. Minamikawa J, Tanaka S, Yamauchi M, Inoue D, Koshiyama H: Potent inhibitory effect of troglitazone on carotid arterial wall thickness in type 2 diabetes. *J Clin Endocrinol Metab* 83:1818–1820, 1998
20. Koshiyama H, Shimono D, Kuwamura N, Minamikawa J, Nakamura Y: Inhibitory effect of pioglitazone on carotid arterial wall thickness in type 2 diabetes. *J Clin Endocrinol Metab* 86:3452–3456, 2001
21. Takagi T, Akasaka T, Yamamuro A, Honda Y, Hozumi T, Morioka S, Yoshida K: Troglitazone reduces neointimal tissue

- proliferation after coronary stent implantation in patients with non-insulin dependent diabetes mellitus: a Serial Intravascular Ultrasound Study. *J Am Coll Cardiol* 36: 1529–1535, 2000
22. Takagi T, Yamamuro A, Tamita K, Yamabe K, Katayama M, Morioka S, Akasaka T, Yoshida K: Impact of troglitazone on coronary stent implantation using small stents in patients with type 2 diabetes mellitus. *Am J Cardiol* 89:318–322, 2002
23. Kuehnle HF: New therapeutic agents for the treatment of NIDDM. *Exp Clin Endocrinol Diabetes* 104:93–101, 1996
24. Suter SL, Nolan JJ, Wallace P, Gumbiner B, Olefsky JM: Metabolic effects of new oral hypoglycemic agent CS-045 in NIDDM subjects. *Diabetes Care* 15:193–203, 1992
25. Ridker PM, Hennekens CH, Buring JE, Rifal N: C-reactive protein and other markers of inflammation in the prediction of cardiovascular disease in women. *N Engl J Med* 343:836–843, 2000
26. Han TS, Satter N, Williams K, Gonzalez-Villalpando C, Lean MEJ, Haffner SM: Prospective study of C-reactive protein in relation to the development of diabetes and metabolic syndrome in the Mexico City Diabetes Study. *Diabetes Care* 25: 2016–2021, 2002
27. Lehmann ED: Clinical value of aortic pulse-wave velocity measurement. *Lancet* 354:528–529, 1999
28. Cruickshank K, Riste L, Anderson SG, Wright JS, Dunn G, Gosling RG: Aortic pulse-wave velocity and its relationship to mortality in diabetes and glucose intolerance: an integrated index of vascular function? *Circulation* 106:2085–2090, 2002
29. Haffner SM, Kennedy E, Gonzalez C, Stern MP, Miettinen H: A prospective analysis of the HOMA model: the Mexico City Diabetes Study. *Diabetes Care* 19: 1138–1141, 1996
30. Macy EM, Hayes TE, Tracy RP: Variability in the measurement of C-reactive protein in healthy subjects: implications for reference intervals and epidemiological applications. *Clin Chem* 43:52–58, 1997
31. Masuzaki H, Ogawa Y, Hosoda K, Miyawaki T, Hanaoka I, Hiraoka J, Yasunao A, Nishimura H, Yoshimasa Y, Nishi S, Nakao K: Glucocorticoid regulation of leptin synthesis and secretion in humans: elevated plasma leptin levels in Cushing's syndrome. *J Clin Endocrinol Metab* 82: 2542–2547, 1997
32. Haffner SM, Greenberg AS, Weston WM, Chen H, Williams K, Freed MI: Effect of rosiglitazone treatment on nontraditional markers of cardiovascular disease in patients with type 2 diabetes mellitus. *Circulation* 106:679–684, 2002
33. Taniwaki H, Kanda H, Kawagishi T, Maekawa K, Emoto M, Nishizawa Y, Shoji T, Morii H: Correlation between the intima-media thickness of the carotid artery and aortic pulse-wave velocity in patients with type 2 diabetes: vessel wall properties in type 2 diabetes. *Diabetes Care* 22: 1851–1857, 1999
34. Cohn JN: Vascular wall function as a risk marker for cardiovascular disease. *J Hypertens* 17:S41–44, 1999
35. Glass CK: Antiatherogenic effects of thiazolidinediones? *Arterioscler Thromb Vasc Biol* 21:295–296, 2001
36. Barbier O, Torra IP, Duguay Y, Blanquart C, Fruchart JC, Glineur C, Staels B: Pleiotropic actions of peroxisome proliferator-activated receptors in lipid metabolism and atherosclerosis. *Arterioscler Thromb Vasc Biol* 22:717–726, 2002
37. Matsuzawa Y, Funahashi T, Nakamura T: Molecular mechanism of metabolic syndrome X: contribution of adipocytokines adipocyte-derived bioactive substances. *Ann N Y Acad Sci* 892:146–154, 1999
38. Maeda N, Takahashi M, Funahashi T, Kihara S, Nishizawa H, Kishida K, Nagaretani H, Matsuda M, Komuro R, Ouchi N, Kuriyama H, Hotta K, Nakamura T, Shimomura I, Matsuzawa Y: PPAR $\gamma$  ligands increase expression and plasma concentrations of adiponectin, an adipose-derived protein. *Diabetes* 50:2094–2099, 2001
39. Yang WS, Jeng CY, Wu TJ, Tanaka S, Funahashi T, Matsuzawa Y, Wang JP, Chen CL, Tai TY, Chuang LM: Synthetic peroxisome proliferator-activated receptor- $\gamma$  agonist, rosiglitazone, increases plasma levels of adiponectin in type 2 diabetic patients. *Diabetes Care* 25:376–380, 2002
40. Kubota N, Terauchi Y, Yamauchi T, Kubota T, Moroi M, Matsui J, Eto K, Yamashita T, Kamon J, Satoh H, Yano W, Frougel P, Nagai R, Kimura S, Kadowaki T, Noda T: Disruption of adiponectin causes insulin resistance and neointimal formation. *J Biol Chem* 277:25863–25866, 2002
41. Matsuda M, Shimomura I, Sata M, Arita Y, Nishida M, Maeda N, Kumada M, Okamoto Y, Nagaretani H, Nishizawa H, Kishida K, Komuro R, Ouchi N, Kihara S, Nagai R, Funahashi T, Matsuzawa Y: Role of adiponectin in preventing vascular stenosis: the missing link of adipo-vascular axis. *J Biol Chem* 277:37487–37491, 2002
42. Hotta K, Funahashi T, Arita Y, Takahashi M, Matsuda M, Okamoto Y, Iwahashi H, Kuriyama H, Ouchi N, Maeda K, Nishida M, Kihara S, Sakai N, Nakajima T, Hasegawa K, Muraguchi M, Ohmoto Y, Nakamura T, Yamashita S, Hanafusa T, Matsuzawa Y: Plasma concentrations of a novel, adipose-specific protein, adiponectin, in type 2 diabetic patients. *Arterioscler Thromb Vasc Biol* 20:1595–1599, 2000
43. Ouchi N, Kihara S, Arita Y, Maeda K, Kuriyama H, Okamoto Y, Hotta K, Nishida M, Takahashi M, Nakamura T, Yamashita S, Funahashi T, Matsuzawa Y: Novel modulator for endothelial adhesion molecules: adipocyte-derived plasma protein adiponectin. *Circulation* 100:2473–2476, 1999
44. Hirose H, Kawai T, Yamamoto Y, Taniyama M, Tomita M, Matsubara K, Okazaki Y, Ishii T, Oguma Y, Takei I, Saruta T: Effects of pioglitazone on metabolic parameters, body fat distribution, and serum adiponectin levels in Japanese male patients with type 2 diabetes. *Metabolism* 51:314–317, 2002
